# Supplementary material for: Rapid oxygen diffusive lithium–oxygen batteries using a restacking-inhibited, free-standing graphene cathode film
Source: Royal Society of Chemistry journal article supplement (doi:10.1039/c9ta00320g), 2019-01-01
Supplement: c9ta00320g1.pdf [file c9ta00320g1.pdf]

# Supporting Information

## Rapid Oxygen Diffusive Lithium-Oxygen Battery using Restacking-inhibited, Free-Standing Graphene Cathode Film

In-Sun Jung,<sup>‡a,c</sup> Hyuk Jae Kwon,<sup>‡a</sup> Mokwon Kim,<sup>a</sup> Doyoung Kim,<sup>b,c</sup> Junghwa Kim,<sup>a</sup> Hyangsook Lee,<sup>a</sup> Dongjin Yun,<sup>a</sup> Sunjung Byun,<sup>a</sup> Daeun Yu,<sup>a</sup> Hyunju An,<sup>a</sup> Jaeduck Jang,<sup>a</sup> Dongmin Im,<sup>a</sup> Hyoyoung Lee<sup>b,c\*</sup>

<sup>a</sup> Samsung Advanced Institute of Technology, Samsung Electronics Co., Ltd, 130 Samsung-ro, Yeongtong-gu, Suwon-si, Gyeonggi-do, 16678, Republic of Korea.

<sup>b</sup> Center for Integrated Nanostructure Physics (CINAP), Institute of Basic Science (IBS), 2066, Seoburo, Jangsan-Gu, Suwon, Gyeonggi-Do 16419, Republic of Korea

<sup>c</sup> Department of Chemistry and Department of Energy Science, Sungkyunkwan University, Suwon-si, Gyeonggi-do, 16419, Republic of Korea

**Figure S1.** (a) The  $^{13}\text{C}$  CP-MAS NMR and (b)  $^1\text{H}$  MAS NMR of graphene oxide (GO, black) and non-stacked graphene oxide (NS-GO, red)

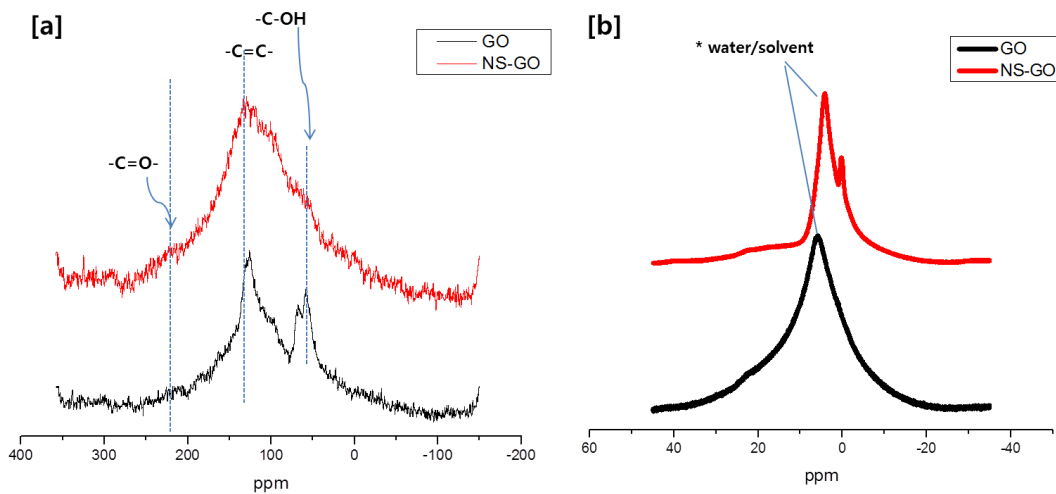

|             | Area        | Center | Width | Height    | %Area of C=C peak (SP2) | C-O peak Ratio (SP3) |
|-------------|-------------|--------|-------|-----------|-------------------------|----------------------|
| GO peaks    | 4275500000  | 14.3   | 75.4  | 36078000  | 71                      | 0.67                 |
|             | 7275200000  | 59.4   | 23.3  | 199130000 |                         |                      |
|             | 27828000000 | 124.0  | 59.5  | 297540000 |                         |                      |
| NS-GO peaks | 736560000   | 1.7    | 21.9  | 21459000  | 77                      | 0.29                 |
|             | 14445000000 | 70.4   | 85.5  | 107600000 |                         |                      |
|             | 49947000000 | 126.6  | 84.6  | 375680000 |                         |                      |

**Figure S2.** The FT-IR spectra of graphene oxide (GO) and non-stacked graphene oxide (NS-GO)

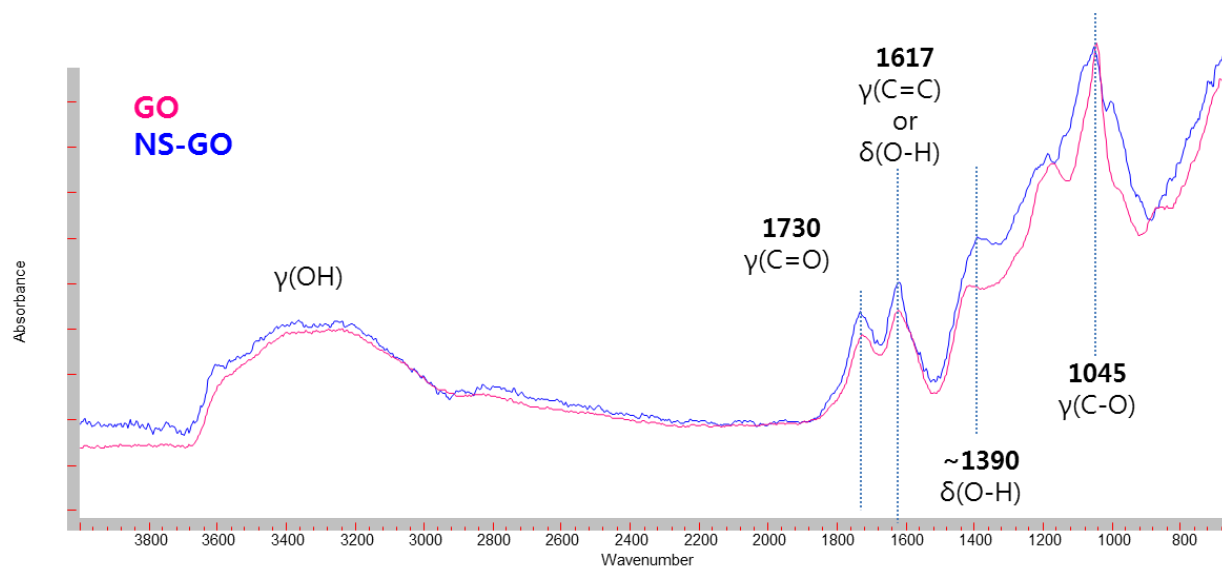

**Figure S3.** The  $^{13}\text{C}$  CP-MAS NMR of (a) non-stacked reduced graphene oxide (NS-rGO) and (b) partially reduced non-stacked-GO (p\*-NS-rGO)

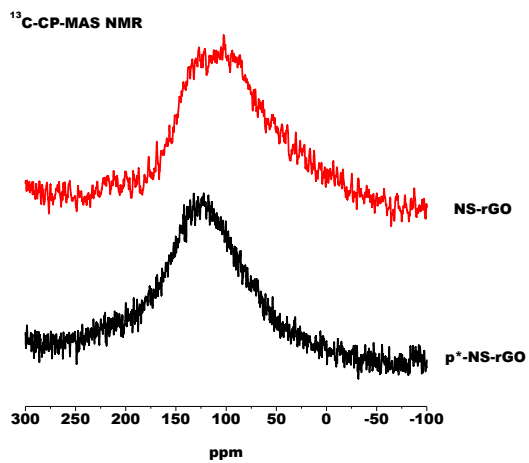

**Figure S4.** The XPS results of (a) graphene oxide (GO), (b) non-stacked graphene oxide (NS-GO), (c) thermally reduced GO (T-rGO), (d) non-stacked reduced graphene oxide (NS-rGO)

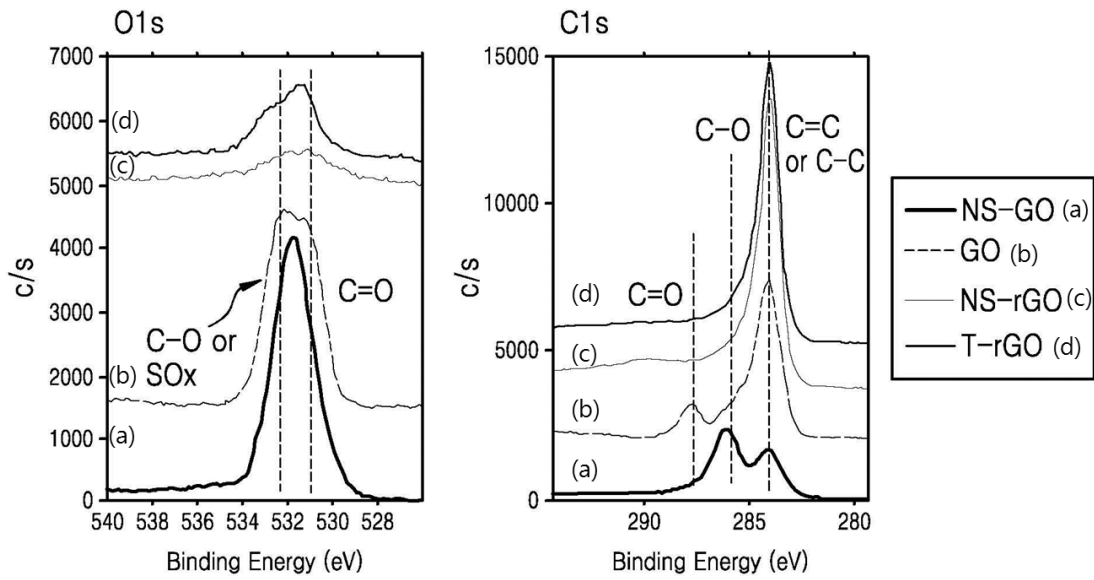

|            | C1s  | N1s | O1s  | Na1s | Si2p | S2p |
|------------|------|-----|------|------|------|-----|
| (a) NS-GO  | 62.8 | 0.7 | 34.0 | 1.1  | 0.1  | 1.2 |
| (b) GO     | 73.2 | 0.7 | 25.3 | 0.0  | 0.5  | 0.2 |
| (c) NS-rGO | 95.2 | 0.5 | 3.3  | 0.5  | 0.1  | 0.4 |
| (d) T-rGO  | 90.7 | 0.0 | 7.0  | 0.1  | 2.0  | 0.2 |

**Figure S5.** The Raman spectra of graphene oxide (GO) and non-stacked graphene oxide (NS-GO)

(a) Raman spectra of Graphene oxide derivatives ( $I_D/I_G$ )

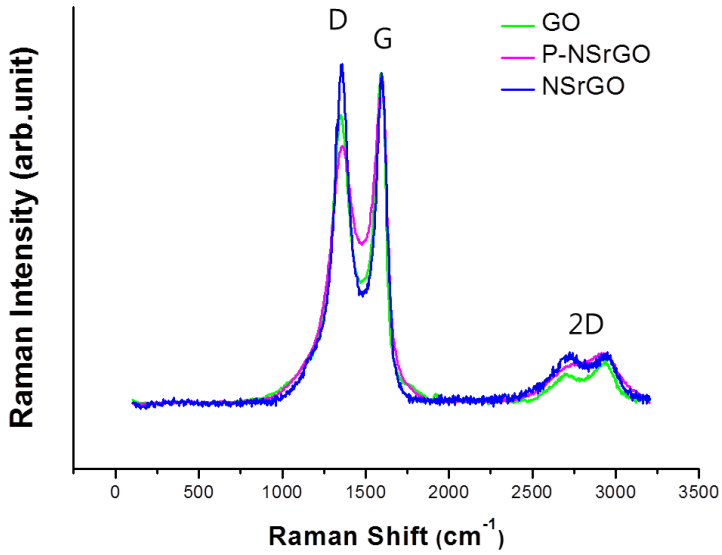

b) 2D bands of Graphene oxide derivatives

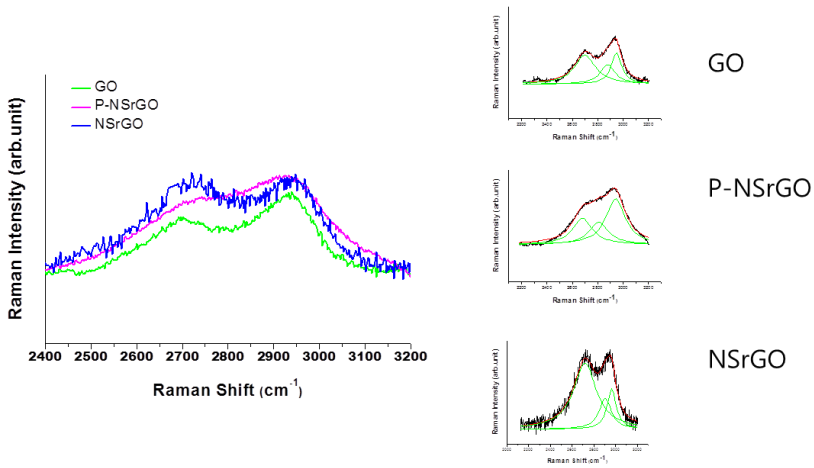

| No.     | D      |         | G      |         | ID/IG | 2D     |       |
|---------|--------|---------|--------|---------|-------|--------|-------|
|         | Xc     | Id      | Xc     | Ig      |       | Xc     | I2D   |
| GO      | 1352.6 | 0.82408 | 1595.5 | 0.84706 | 0.97  | 2699.4 | 0.077 |
| P-NSrGO | 1360.2 | 0.74267 | 1597.9 | 0.81399 | 0.91  | 2680.2 | 0.070 |
| NSrGO   | 1356.1 | 0.96282 | 1598.3 | 0.89801 | 1.07  | 2717.4 | 0.128 |

**Figure S6.** The  $^7\text{Li}$  MAS NMR spectra of the carbon (Printex) film (a) carbon:electrolyte=1:4, (b) carbon:electrolyte=1:8, (c) carbon:electrolyte=1:10 (d) NS-rGO:electrolyte=1:10, (e) the comparison results of peak width at the  $^7\text{Li}$  MAS NMR spectra; The  $^7\text{Li}$  MAS NMR spectra were obtained after soaking in electrolyte at a spinning rate of 13k, in which the graphene derivatives contain an ionic liquid electrolyte, (diethylmethyl(2-methoxyethyl)ammonium bis(trifluoromethane) sulfonamide, DEMA-TFSi) containing 1.0 M bis(trifluoromethane) sulfonimide lithium salt (LiTFSi).

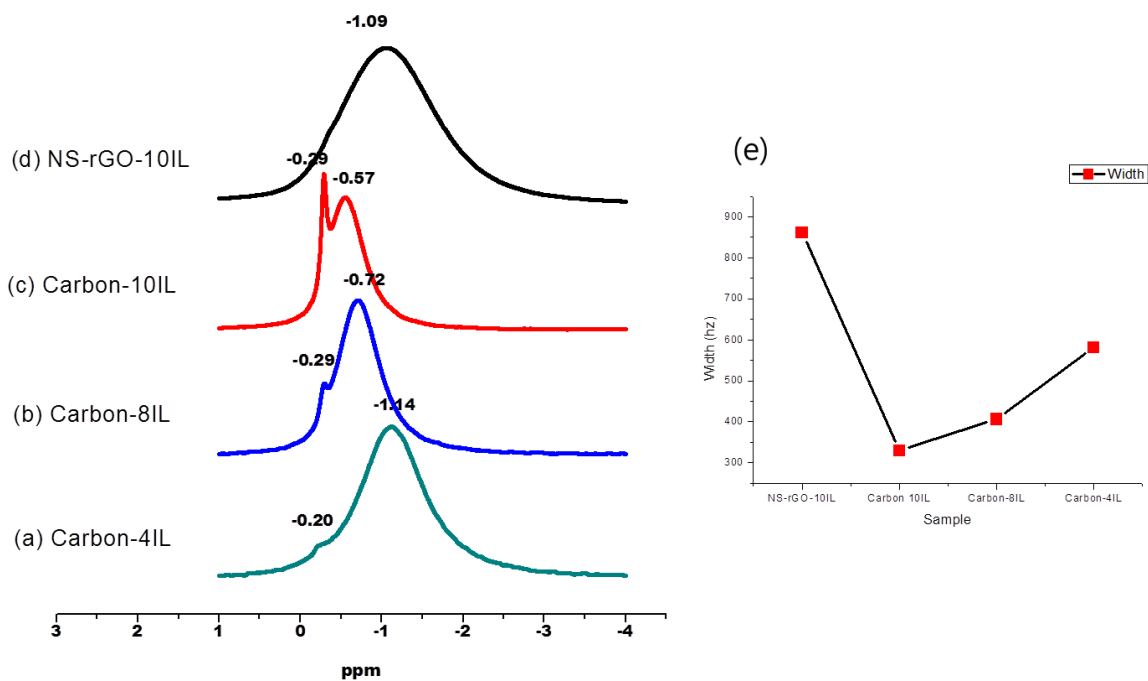

**Figure S7.** Cell structure (Li/interlayer/cathode/GDL/SUS) of a Li-air battery (Li-O<sub>2</sub> MIT cell) including the freestanding film, roll-pressed cathode; graphene derivatives/DEMA-LiTFSi-PTFE (1:5:0.2), cathode area (1.13cm<sup>2</sup>), weight (3.9 mg/cm<sup>2</sup>), graphene derivatives loading (0.64 mg/cm<sup>2</sup>) at 60°C

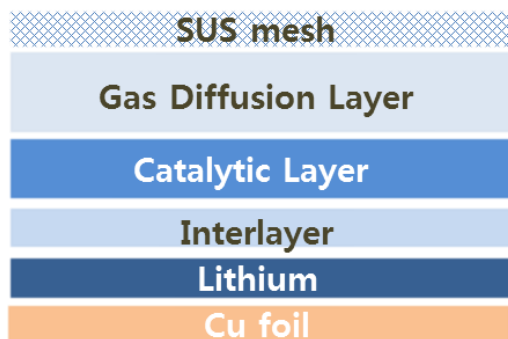



**Figure S8.** Discharge and charge profiles of non-stacked reduced GO (NS-rGO) for the cathode material up to 10 cycles under full discharge capacity condition. The test conditions included a cut-off voltage of ( $1.8 < V < 4.5$ ), current density:  $0.24\text{mA}/\text{cm}^2$  under 1 atm oxygen gas and room temperature, discharge: CC mode, charge: CC-CV mode.

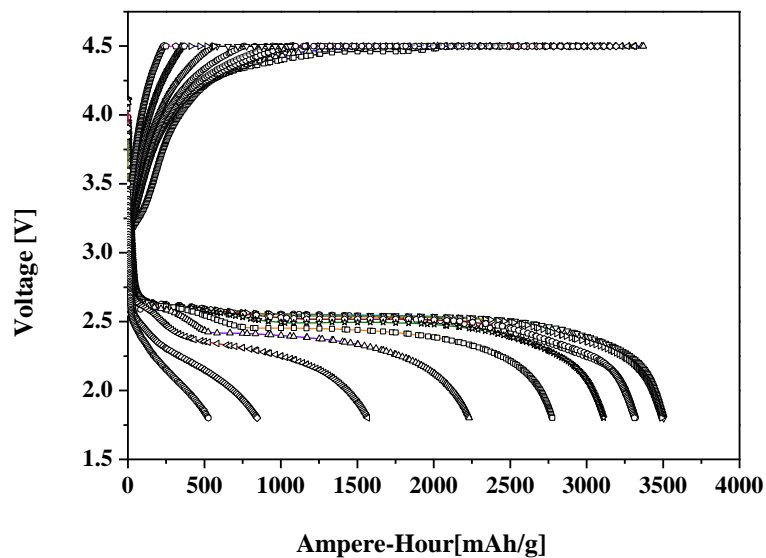

**Figure S9.** The cross-section SEM images of the NS-rGO powder and magnification ranging from (a)1,000X (b) 10,000X (c) 50,000X to (d) 100,000X

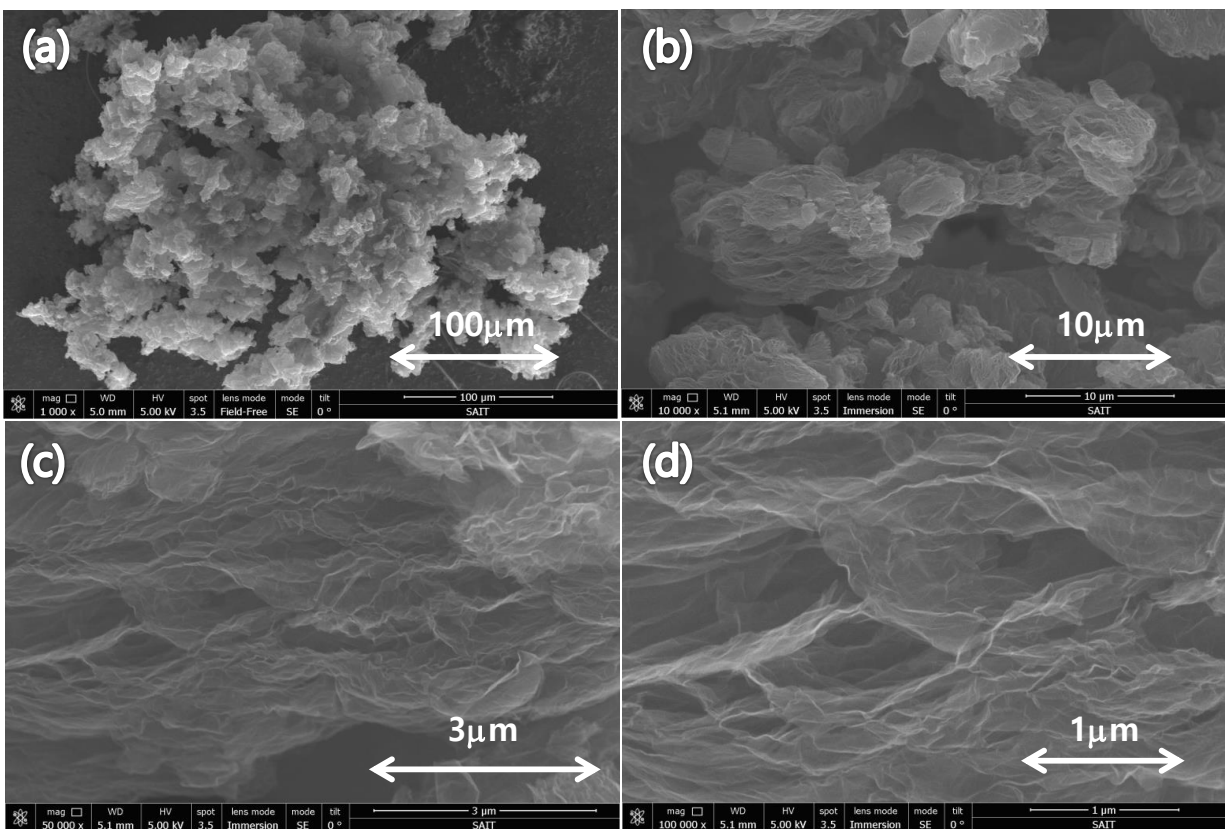

***The synthetic process of non-stacked graphene oxide (NS-GO) and non-stacked reduced graphene oxide (NS-rGO):***

Graphene oxide (GO) was prepared by the modified Hummer's method from natural graphite using sulfuric acid, potassium permanganate, and sodium nitrate. We followed our previous paper<sup>1</sup> to fabricate NS-GO powder and NS-rGO powder. Briefly, for NS-GO, the GO (1 g) was dispersed in ethanol (1 L) with homogenization (1 hour) and ultra-sonication (1 hour). After pouring cold hexane in dispersed GO solution, the co-solvent system GO solution was filtered by vacuum filtration with continuously stirring and adding pure hexane, and then the solvent was completely evaporated by rotary evaporator. For NS-rGO, the NS-GO (500 mg) on an alumina boat in quartz furnace was treated to form NS-rGO by thermal reduction at 1,000°C for 1 hour (1.5°C/min) under 3% hydrogen/nitrogen atmosphere or under vacuum condition. The total yield was about 40%. For comparison, p\*-NS-rGO sample are performed at about 300°C for 1 hour (p\*-NS-rGO).

---

1. Y. Yoon, K. Lee, C. Baik, H. Yoo, M. Min, Y. Park, S. M. Lee, H. Lee, S. M. Lee, H. Lee, *Adv. Mater.*, 2013, **25**, 4437–4444

**Table S1.** Surface area and pore characterizations of the non-stacked reduced GO (powder) using BET method.

| Samples   | BET Surface area (m <sup>2</sup> /g) | Pore volume (cm <sup>3</sup> /g) | Pore diameter (nm) |
|-----------|--------------------------------------|----------------------------------|--------------------|
| Ns-rGO    | 3414                                 | 25.51                            | 29.89              |
| p*-NS-rGO | 1206                                 | 6.13                             | 20.33              |
| NS-GO     | 325                                  | 0.7                              | 8.6                |

**Table S2.** Surface area and pore characterizations of the non-stacked reduced GO (film) using BET method.

| Samples | BET Surface area (m <sup>2</sup> /g) | Pore volume (cm <sup>3</sup> /g) | Pore diameter (nm) |
|---------|--------------------------------------|----------------------------------|--------------------|
| Ns-rGO  | 164                                  | 1.04                             | 25.3               |
| T-rGO   | 107                                  | 0.24                             | 8.96               |
| C-rGO   | 103                                  | 0.23                             | 9.06               |

**Table S3.** Discharge capacities of graphene oxides for the Li-air battery

| Samples                    | NS-GO | p*-NS-rGO | NS-rGO | T-rGO | C-rGO |
|----------------------------|-------|-----------|--------|-------|-------|
| Discharge capacity [mAh/g] | 150   | 250       | 3320   | 600   | 470   |

**Table S4.** Dimensions and capacities of gas-diffusion layers (a) carbon paper, (b) NS-rGO

| Samples                       | Weight<br>(mg/cm <sup>2</sup> ) | Thickness<br>( $\mu$ m) | Capacity<br>(mAh) | Specific<br>capacity<br>(mAh/g) |
|-------------------------------|---------------------------------|-------------------------|-------------------|---------------------------------|
| GDL-35BA<br>(carbon<br>paper) | 4.3                             | 200                     | 1.52              | 174                             |
| NSrGO                         | 0.61                            | 7                       | 1.62              | 314                             |

\* Cathode layer: CM250 (MWCNT)
